# Supplementary material for: Study on Incentives for Glaucoma Medication Adherence (SIGMA): study protocol for a randomized controlled trial to increase glaucoma medication adherence using value pricing
Source: PubMed Central journal article supplement (PMC4947326; doi:10.1186/s13063-016-1459-1), 2016-07-15

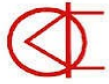

SINGAPORE EYE RESEARCH INSTITUTE

**DUKE NUS**  
GRADUATE MEDICAL SCHOOL SINGAPORE

# SIGMA GLAUCOMA MEDICATION ADHERENCE STUDY

## Participant Instruction Booklet

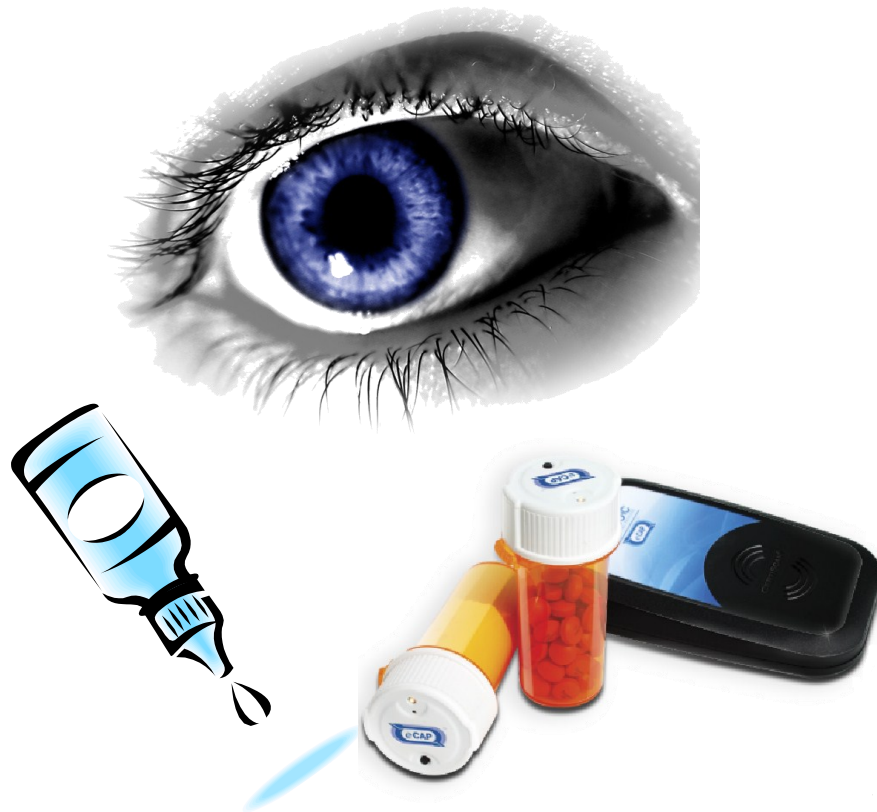

Version 2, 01 Jul 2015

For more information, please call

Or email

## Section A: Study Design

Our **6-month study** seeks to test whether glaucoma patients will use **their eye drops more regularly** if provided **subsidies** for medication and doctor's visit costs

We will compare the medication adherence of participants *randomly allocated* into one of two arms:

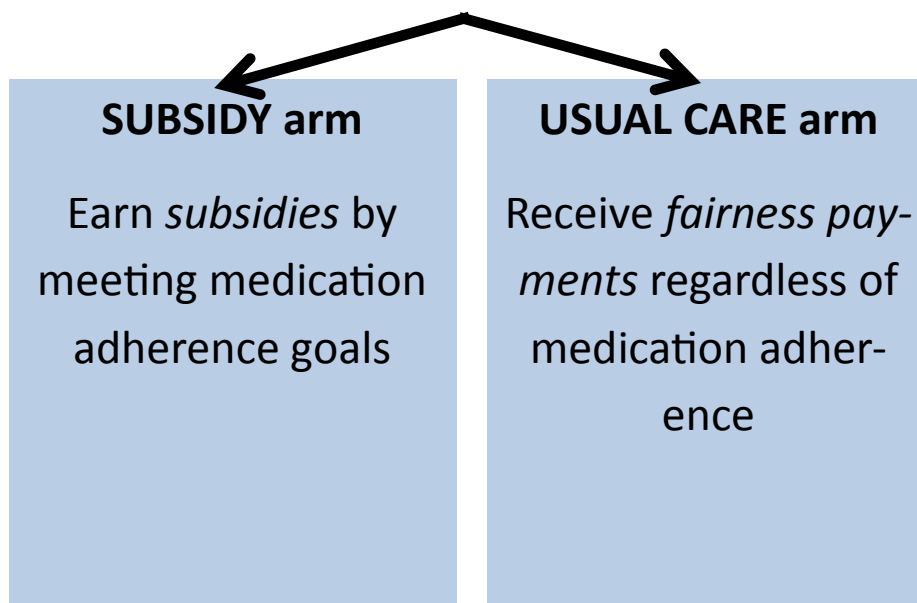

## What would you have to do?

- Keep your glaucoma eye drops in eCAP containers (provided free of charge during the study) that monitor your medication use
- Only open your eCAPs when using your eye drops
- Return your eCAPs at month 3 & 6
- Attend 2 assessment sessions at SNEC

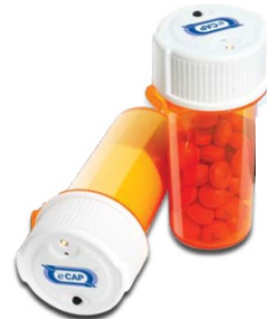

Only participants who complete all study requirements will be provided with study subsidies or reimbursements.

## Section B: Instructions on eCAP Use

### What is an eCAP?

- The eCAP is a device with an in-built electronic tag which records the time whenever it is opened.

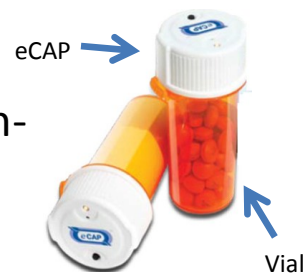

- When you open the eCAP to take out your medication, the time will be recorded.

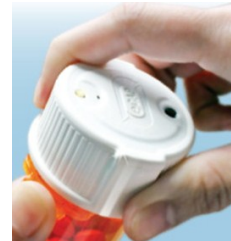

- Store your glaucoma eye drop medication inside the vial covered by the eCAP at all times.

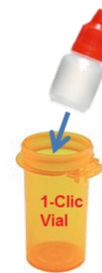

- Only remove eCAP(s) when you are instilling your glaucoma medication. Avoid unnecessary opening of the vial, as it records each time you unscrew the eCAP.
- Use your medication within the dosing windows indicated in your **Eye Drop Dosing Schedule (Section C)**.

- When closing, twist the eCAP until you hear a “beep” sound and see a green light flash. This signals that the eCAP is locked in a proper position.
- Return eCAP(s) to study team for data extraction at month 3 and 6 visits.

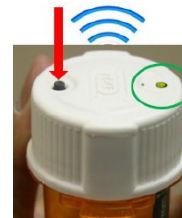

## Section C: Eye Drop Dosing Schedule

Please instill all eyedrop doses within the indicated dosing windows (marked with an X) to be considered adherent to your medication(s).

|          |                 |                      |                                                                                                  |
|----------|-----------------|----------------------|--------------------------------------------------------------------------------------------------|
| <b>1</b> | eCAP ID         | Brand Name           | Eye(s)                                                                                           |
|          | Dose<br>Drop(s) | Frequency<br>x daily | <input type="checkbox"/> Left<br><input type="checkbox"/> Right<br><input type="checkbox"/> Both |

  

| Dosing windows |           |         |
|----------------|-----------|---------|
| Morning        | Afternoon | Evening |
|                |           |         |

  

|  |  |  |  |
|--|--|--|--|
|  |  |  |  |
|--|--|--|--|

↑                      ↑                      ↑                      ↑

|          |                 |                      |                                                                                                  |
|----------|-----------------|----------------------|--------------------------------------------------------------------------------------------------|
| <b>2</b> | eCAP ID         | Brand Name           | Eye(s)                                                                                           |
|          | Dose<br>Drop(s) | Frequency<br>x daily | <input type="checkbox"/> Left<br><input type="checkbox"/> Right<br><input type="checkbox"/> Both |

| Dosing windows |           |         |
|----------------|-----------|---------|
| Morning        | Afternoon | Evening |
|                |           |         |

↑      ↑      ↑      ↑

|          |                 |                      |                                                                                                  |
|----------|-----------------|----------------------|--------------------------------------------------------------------------------------------------|
| <b>3</b> | eCAP ID         | Brand Name           | Eye(s)                                                                                           |
|          | Dose<br>Drop(s) | Frequency<br>x daily | <input type="checkbox"/> Left<br><input type="checkbox"/> Right<br><input type="checkbox"/> Both |

| Dosing windows |           |         |
|----------------|-----------|---------|
| Morning        | Afternoon | Evening |
|                |           |         |

↑      ↑      ↑      ↑

## Section D: Instructions on Adherence Calculation

- Medication use is recorded with each eCAP opening.
- Only eCAP openings **within** the appropriate dosing windows in your **(C) Eye Drop Dosing Schedule** will contribute towards your adherence targets.
- You are considered adherent to your glaucoma medication for a day when you instill all doses for all prescribed glaucoma eye drops within the dosing windows for that particular day.



| <b>Assessment Period</b> | <b>Monitoring Period</b> |
|--------------------------|--------------------------|
| Baseline Assessment      | Week 1—4                 |
| Month 3 Assessment       | Week 5—12                |
| Month 6 Assessment       | Week 15—27               |

Adherence for each period is calculated as:

$$\frac{\text{No. of adherent days}}{\text{No. of days in monitoring period}} \times 100\%$$

Reports on your medication adherence will be sent to you at month 3 and 6.

**Only participants in the SUBSIDY arm  
have the opportunity to earn subsidies**

### **Section E: Instructions on Subsidy Calculation**

- Subsidies are applied to an estimate of your 3 month healthcare costs at the month 3 and 6 assessments.
- Consultation and medication receipts collected from you at enrolment are used to estimate your 3 month healthcare costs

**Your estimated 3 month  
healthcare costs = \_\_\_\_\_**

Based on the proportion of days that you are adherent to your medication over each monitoring period (at month 3 & 6), you will receive a certain percentage of subsidies on your estimated 3 month healthcare costs.

| Monitoring period                          | Total no. of days | Adherent days to reach 90% target | Adherent days to reach 75% target |
|--------------------------------------------|-------------------|-----------------------------------|-----------------------------------|
| 1                                          | 56                | 51                                | 42                                |
| 2                                          | 84                | 76                                | 64                                |
| Subsidies given for healthcare costs       |                   | 50%                               | 25%                               |
| Subsidies for 3 months of healthcare costs |                   |                                   |                                   |

## Section F: Study & Payment Schedule

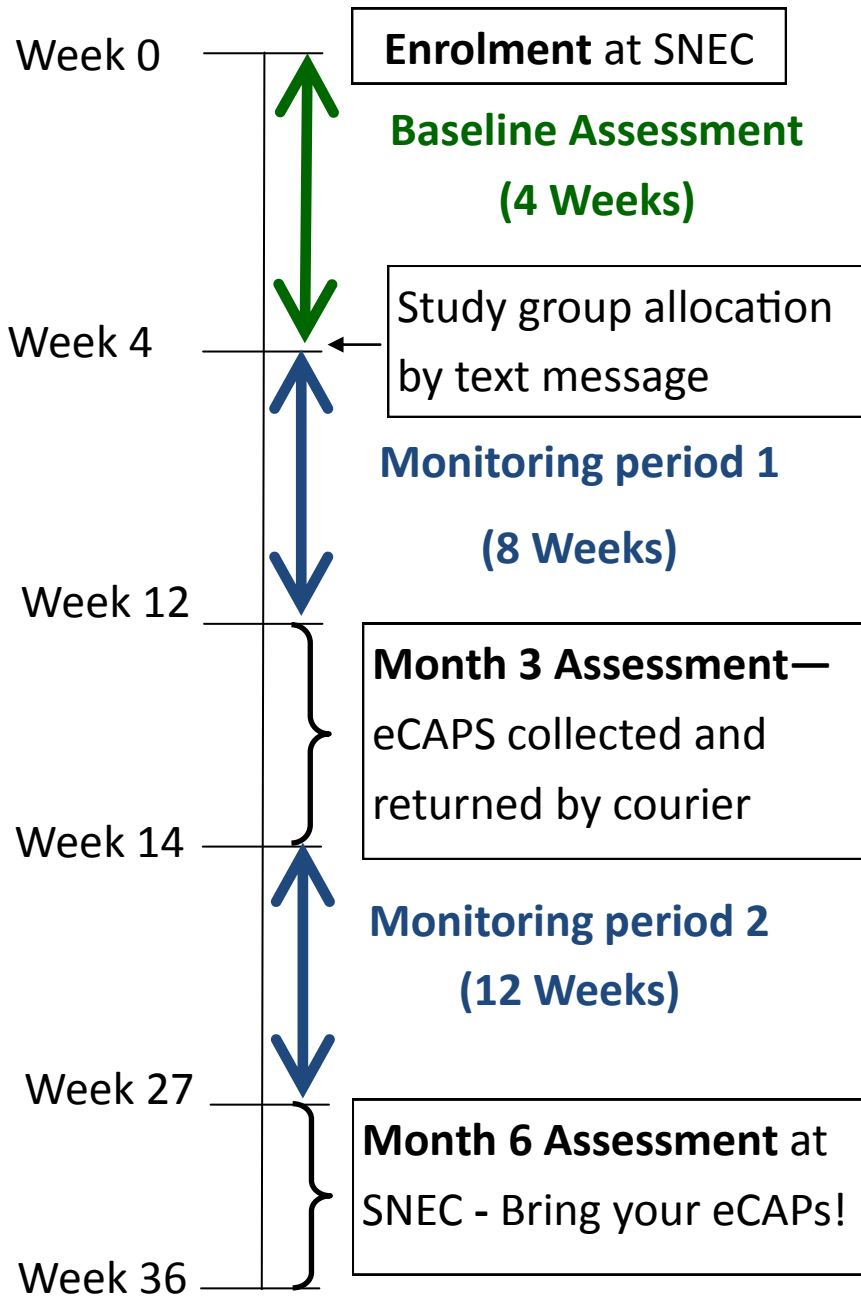

| Payment Schedule                   |                                                                   |                                               |
|------------------------------------|-------------------------------------------------------------------|-----------------------------------------------|
| Week from baseline :               | SUBSIDY arm                                                       | USUAL CARE arm                                |
| Enrolment (Week 0)                 | \$10 in NTUC Vouchers                                             |                                               |
| Month 3 Assessment (Week 13 – 14)  | Bank transfer of \$20 for return of eCAPs                         |                                               |
|                                    | Bank Transfer of subsidies earned                                 | Bank Transfer of \$30 <i>fairness payment</i> |
| Month 6 Assessment (After Week 27) | \$30 NTUC vouchers for completion of month 6 assessment           |                                               |
|                                    | Bank transfer of subsidies earned (Within 2 weeks of eCAP return) | \$30 NTUC voucher <i>fairness payment</i>     |

## Frequently asked questions

*What should I do about a lost / damaged eCAP / eCAP that does not close with a “beep” sound and a flashing of a green light?*

- Please get in touch with the study team who will arrange for a replacement eCAP to be sent to you free of charge

*When will I receive my study payments?*

- All study payments that are not issued in NTUC vouchers will be made available by bank transfer within 2 weeks of eCAP return to the study team

## Study Contact Numbers

### *Assistance on eCAPs & study appointments:*

#### Study Research Optometrist

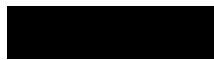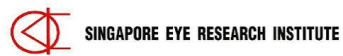

11 Third Hospital Avenue #05-00, SNEC  
Building, (S) 168751

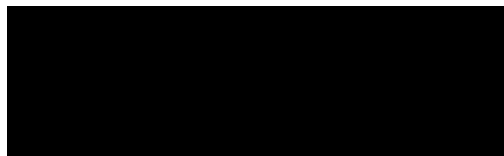

### *Assistance on adherence & subsidies:*

#### Study Project Coordinator

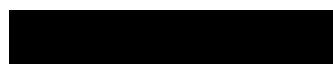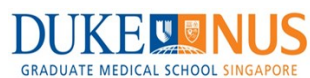

8 College Road, Level 4, Duke NUS Graduate  
Medical School, (S) 169857

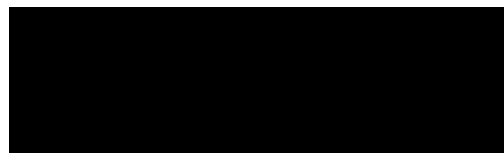

Supplement: 13063_2016_1459_MOESM1_ESM.pdf [file 13063_2016_1459_MOESM1_ESM.pdf]
